# Supplementary material
Source: Springer Nature journal article supplement (https://www.springermedizin.de/resource/supplementary/13229_2009_8_MOESM3_ESM.pdf/9675988)

### a. Nonparametric

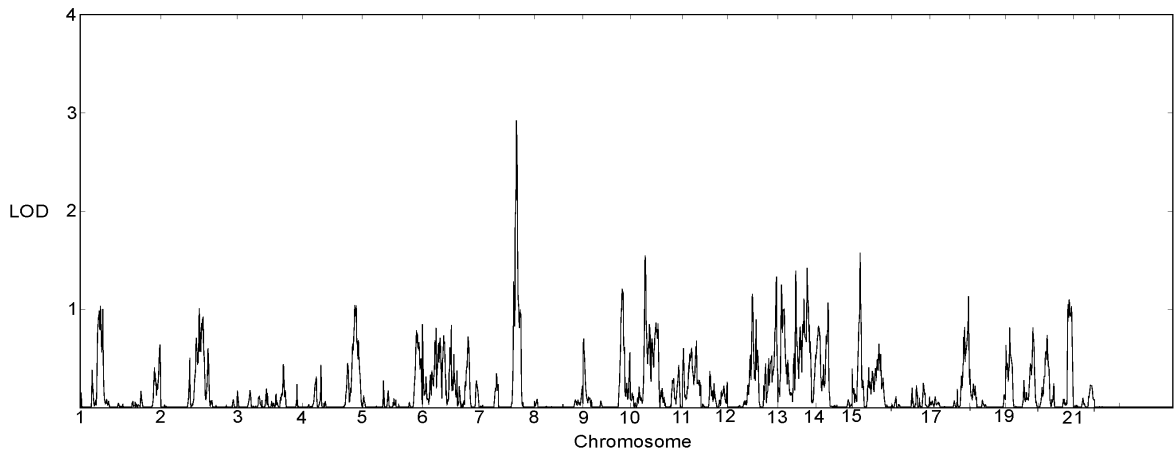

### b. Parametric

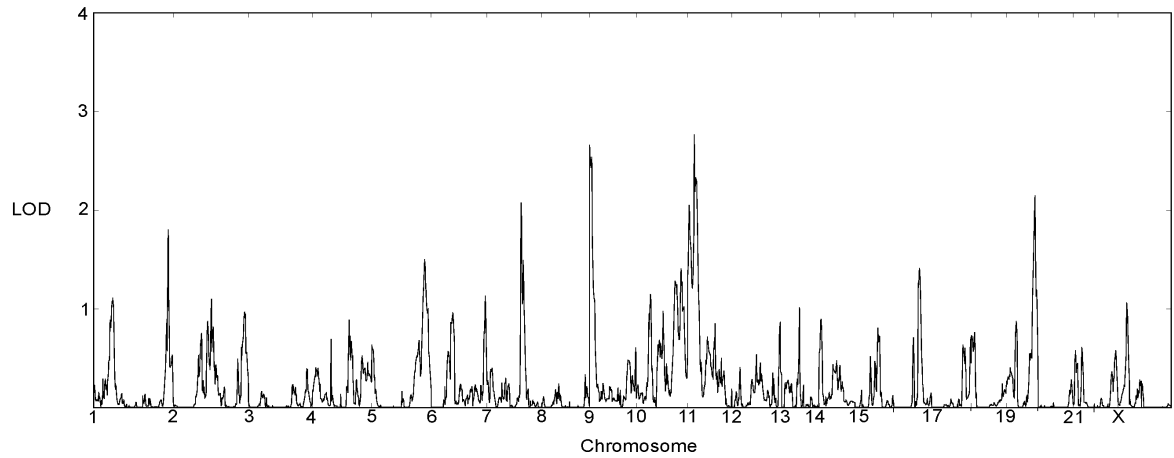

Supplement: MOESM3 [file 9675988]
